# Supplementary material for: NUC041, a Prodrug of the DNA Methytransferase Inhibitor 5-aza-2′,2′-Difluorodeoxycytidine (NUC013), Leads to Tumor Regression in a Model of Non-Small Cell Lung Cancer
Source: MDPI journal article supplement (doi:10.3390/ph11020036), 2018-04-23
Supplement: s1 [file s1]

## Supplementary Materials

**Table S1:** Study of the stability of NUC041 formulated in PPD stored at 2-8°C for 60 days, as measured by HPLC.

| ID                   | Assay (mg/mL) | % Recovery vs assay time 0 |
|----------------------|---------------|----------------------------|
| NUC041 in PPD time 0 | 16.24         | -                          |
| NUC041 in PPD day 60 | 16.05         | 98.8                       |

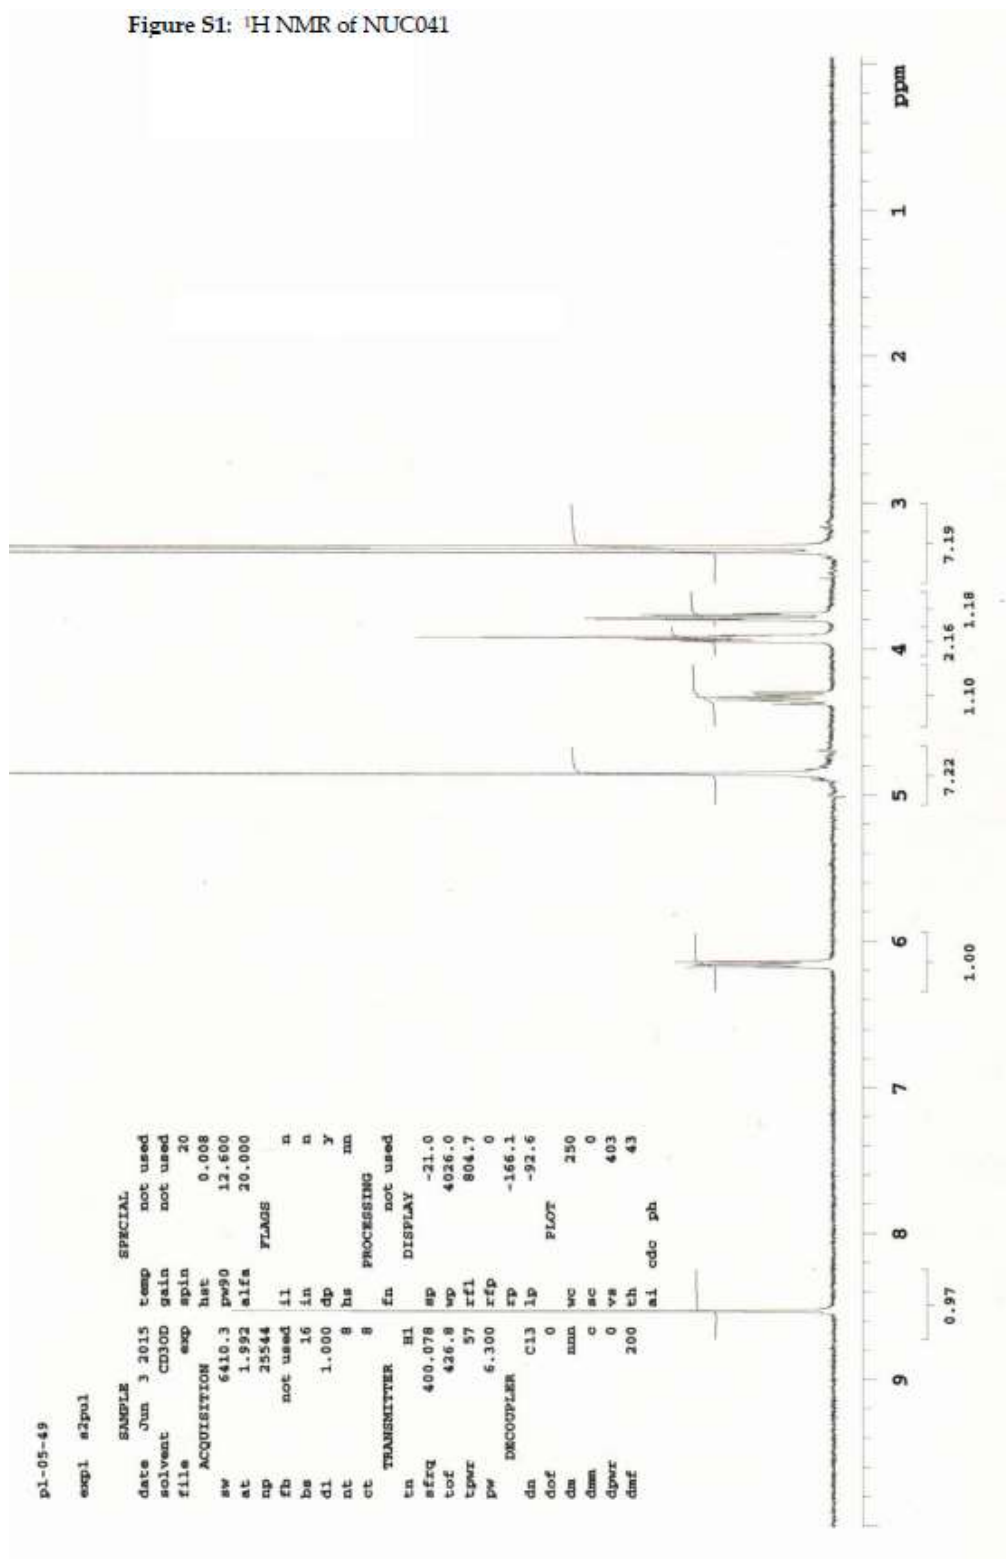

**Figure S1:** NUC041 formulated in PPD is stable when it is stored at 2-8°C for 60 days. The recovery at this storage condition for 60 days is approximately 98.8%.
